# Knock-in tagging in zebrafish facilitated by insertion into non-coding regions

Daniel S. Levic<sup>1\*</sup>, Naoya Yamaguchi<sup>2</sup>, Siyao Wang<sup>1</sup>, Holger Knaut<sup>2</sup>, Michel Bagnat<sup>1\*</sup>

<sup>1</sup>Department of Cell Biology, Duke University, Durham, NC, United States; <sup>2</sup>Skirball Institute of Biomolecular Medicine, New York University Grossman School of Medicine, NY, United States

\*Correspondence to Michel Bagnat: michel.bagnat@duke.edu or Dan Levic: daniel.levic@duke.edu

## Keywords

Zebrafish, knock-in, epithelial, morphogenesis, CRISPR, quantitative imaging

## Summary statement

Generation of endogenously tagged stable zebrafish knock-in lines is simplified by the integration of fluorescent protein cassettes with mRNA splicing elements into non-coding regions of genes.

## Abstract

Zebrafish provide an excellent model for *in vivo* cell biology studies due to their amenability to live imaging. Protein visualization in zebrafish has traditionally relied on overexpression of fluorescently tagged proteins from heterologous promoters, making it difficult to recapitulate endogenous expression patterns and protein function. One way to circumvent this problem is to tag the proteins by modifying their endogenous genomic loci. Such an approach is not widely available to zebrafish researchers due to inefficient homologous recombination and the error-prone nature of targeted integration in zebrafish. Here, we report a simple approach for tagging proteins in zebrafish on their N- or C termini with fluorescent proteins by inserting PCR-generated donor amplicons into non-coding regions of the corresponding genes. Using this approach, we generated endogenously tagged alleles for several genes critical for epithelial biology and organ development including the tight junction components ZO-1 and Cldn15la, the trafficking effector Rab11a, the apical polarity protein aPKC, and the ECM receptor Integrin  $\beta$ 1b. Our approach facilitates the generation of knock-in lines in zebrafish, opening the way for accurate quantitative imaging studies.

## Introduction

Protein visualization in zebrafish has traditionally relied on overexpression approaches based on microinjection of mRNA or random integration of small tagged transgenes (Kwan et al., 2007). These approaches are limited because overexpression seldom recapitulates endogenous levels and patterns. Bacterial artificial chromosome (BAC) transgenes (Bussmann and Schulte-Merker, 2011, Navis et al., 2013, Alvers et al., 2014, Rodriguez-Fraticelli et al., 2015, Fuentes et al., 2016) can recapitulate endogenous expression if they include necessary regulatory sequences. However, regulatory sequences can reside hundreds of kilobases away from the gene of interest, preventing their inclusion on a BAC transgene. Moreover, expression levels of BAC transgenes vary depending on the genomic insertion site (Fuentes et al., 2016) and copy number (Chandler et al., 2007). The most accurate way to recapitulate physiological gene expression is to tag the gene directly at its endogenous genomic locus to produce fusion proteins (Gibson et al., 2013), an approach referred to as knock-in (KI). KI has recently become feasible in cell lines and many model organisms (Dickinson et al., 2015, Koles et al., 2016, Dewari et al., 2018, Gao et al., 2019, Cronan and Tobin, 2019). In zebrafish, homology-based methods for generating KI lines have been described (Hoshijima et al., 2016, Wierson et al., 2020,

Ranawakage et al., 2021). However, the available methods rely on inefficient DNA repair pathways, which are required for the precise integration of large DNA sequences (Peng et al., 2014). As a result, only a few KI zebrafish lines have been reported. N-terminal tagging has been difficult in zebrafish, with only insertion of small peptides (Hoshijima et al., 2016, Ranawakage et al., 2021) and one reported fluorescent protein tag (Wilson et al., 2021). To circumvent these challenges, we devised a simple KI approach where precise integration is not needed for expression of endogenously tagged proteins. We targeted non-coding regions of genes, such as introns and 5' untranslated regions (5' UTRs), for integration of targeting cassettes that code for fluorescent proteins. Imprecise integration events do not affect expression of tagged proteins because non-coding sequences targeted by CRISPR-Cas9 are removed from the transcripts during RNA splicing. We used this approach to generate stable zebrafish KI lines for several proteins tagged on their N- or C-terminus with fluorescent proteins. KI tagging in zebrafish opens the door for quantitative imaging studies, such as quantifying endogenous protein levels. As a proof of principle, we measured the concentration of endogenous eGFP-Rab11a molecules on apical vesicles in epithelial cells.

## Results and Discussion

To establish KI methods in zebrafish, we sought to integrate fluorescent protein cassettes into non-coding regions of genes. For C-terminal tagging, we used CRISPR-Cas9 to induce a double strand DNA (dsDNA) break in the last intron (Fig. 1A) at least 100 base pairs (bp) upstream of the last exon to minimize RNA splicing interference (Fig. 1A). Together with Cas9 and gRNA, we co-injected linear dsDNA PCR donor amplicons spanning part of a gene's last intron and last exon coding sequence fused to a fluorescent protein coding sequence and polyadenylation (polyA) sequence (Fig. 1B). The intron serves as a splice acceptor element. Integration of the donor can proceed through non-homologous end joining (NHEJ) at the 5' and 3' ends (Fig. 1C). Expression of the modified transcript can tolerate errors, such as insertion-deletion mutations (INDELs) at integration boundaries, because these sequences are removed during RNA splicing (Fig. 1D). Because C-terminal tagging can impair function of many proteins, we also devised a strategy for N-terminal tagging by targeting non-coding regions upstream of the start codon (Fig. 1E). N-terminal PCR repair donors contain a 500 bp homology arm (the endogenous sequence upstream from the CRISPR-Cas9-induced dsDNA break), which is fused to the remaining upstream non-coding sequence, coding sequence of a fluorescent protein, coding sequence of the endogenous exon that harbors the start codon, and a portion of the following intron as a splice donor element (Fig. 1F). To promote seamless integration at the 5' end of the repair donor in the UTR, we mutated the gRNA target site in the repair donor (Fig. 1F). Integration of the 3' end of the repair donor does not require precise insertion by HDR because the intronic portion of the donor sequence is removed from transcripts during RNA splicing. (Fig. 1G-H).

For some KI alleles, such as p2A-Cre, visual screening is not feasible in the absence of other markers. Therefore, we devised a slightly modified approach for inserting larger sequences. We constructed a donor plasmid in which an endogenous splice acceptor element and the coding sequence of the last exon is cloned upstream of a tag of interest followed by a polyA sequence. The splice acceptor element in the donor plasmid is targeted and linearized by the same gRNA target site as the endogenous genomic intron. Integration of the donor and expression of the modified transcript follows similar principles as described for PCR donors, but this approach allows for the addition of larger cassettes that include transgenesis markers. Insertions can be identified based on the expression of the transgenesis marker, but orientation of the insertion and expression of the tagged protein need to be confirmed by sequencing across the modified genomic region and by immunohistochemistry, respectively.

Using these approaches, we tagged several genes involved in epithelial morphogenesis. We injected KI cocktails containing Cas9 protein, gRNAs, and repair donors into 1-cell stage embryos and visually screened embryos for fluorescence, comparing them to reported expression patterns of the endogenous transcripts (Howe et al., 2021). We consistently observed expression of the fusion proteins in 1-5% of the injected embryos. Injected embryos with expression showed varying levels of mosaicism (Fig. S1A-D), which, combined with restricted subcellular localization and endogenous levels of some proteins like aPKC, required us to use live confocal microscopy to identify embryos with KI insertions (Fig. S1A-C).

To optimize conditions for KI in zebrafish, we focused on *rab11a* because this gene exhibits widespread expression and KI insertion can be scored by visual screening (Fig. S1D). We prepared dsDNA or single-stranded DNA (ssDNA) repair donors for *rab11a* while modifying gRNA targeting. Although mutating the gRNA target site on the donor was not required for KI, this resulted in a >2-fold increase in efficiency (Fig. 1I). However, inducing dsDNA breaks on both the 5' and 3' ends of the integration site did not enhance KI efficiency, nor did using ssDNA as repair donor instead of dsDNA (Fig. 1I).

To determine whether precise genomic integration is important for our KI approach, we obtained 3 stable alleles for *eGFP-rab11a* using different gRNA target sites and/or repair donors (Fig. S2A-C). While the 5' integration ends of the three alleles proceeded seamlessly, the lines showed distinct INDELs at the 3' integration boundaries of intron 1. Additionally, the 3' non-coding donor sequence of the ssDNA-generated allele was 390 bp shorter than the other alleles (Fig. S2C). However, these sequence alterations had no detectable effect on eGFP-Rab11a protein expression levels probably because the INDELs affect only non-coding regions. These findings indicate that KI integration sites in non-coding regions of genes, at least within introns, have minimal impact on expression of endogenously tagged proteins.

To determine the germline transmission efficiency of our approach, we targeted *cldn15la*, *rab11a*, and *tjp1a* and raised to adulthood only F0 embryos that showed mosaic expression. We then outcrossed 3–5 F0 animals for each target to wild-type (WT) fish and determined the percentage of stably expressing F1 embryos. *cldn15la* and *tjp1a*, targeted for C-terminal tagging of the gene products, showed similar levels of germline transmission rates with 26.9% and 17.1% of F1 progeny showing expression, respectively (Fig. 1J). We observed similar levels of efficiency despite using tdTomato (~1400 bp) as a tag for *cldn15la* and eGFP (~700 bp) for *tjp1a*, suggesting that insertion sizes in this range likely do not impact KI efficiency. For N-terminal tagging, we compared *rab11a* KI using dsDNA or ssDNA as donor sequences. However, using ssDNA as a repair donor did not improve the efficiency of obtaining stably expressing F1 embryos (Fig. 1J), indicating that simple dsDNA PCR donor amplicons are effective for KI in zebrafish.

We next monitored expression and localization of endogenously tagged proteins in stably expressing larvae. ZO1 (Tjp1a) is a peripheral component of tight junctions and is localized cortically in epithelial cells (Zihni et al., 2016). ZO1-tdTomato showed widespread expression in epithelial organs, with enriched expression in the lens, floor plate, neural tube, vasculature, and intestine (Fig. 2A). In the eye, ZO1-tdTomato was present in the lens epithelium and lens fiber cells (Fig. 2B, Movie 1), while in the trunk was enriched in the dorsal aorta, caudal vein, intersegmental vessels, and notochord sheath cells (Fig. 2C, Movie 2). ZO1-tdTomato also labeled epithelial cells throughout the otic capsule (Fig. 2D, Movie 3). We also generated a KI line expressing ZO1-eGFP and when crossed to the ZO1-tdTomato line, the two proteins showed identical expression patterns and perfect co-localization (Fig. S3A). In the epidermis, endogenously tagged ZO1 was highly expressed in lateral line neuromasts, while in periderm cells it was enriched at tricellular junctions (Fig. S3B-C).

To specifically label intestinal epithelial cells (IECs), we targeted *cldn15la*, which encodes a member of the claudin family of tetraspanin membrane proteins that form tight junctions. Cldn15la is an atypical claudin that is not restricted to tight junctions and is instead localized along basolateral membranes (Alvers et al., 2014). Similar to the transgenic *TgBAC(cldn15la-GFP)<sup>pd1034</sup>* allele (Fig. S4A-B) (Alvers et al., 2014), endogenously

tagged *Cldn15la*-tdTomato was expressed in all IECs (Fig. 2E-F), where it localized to basolateral membranes throughout gut development (Fig. 2G-H). Of note, unlike the *TgBAC(cldn15la-GFP)<sup>pd1034</sup>* allele which is homozygous lethal at embryonic stages, homozygous *TgKI(cldn15la-tdTomato)<sup>pd1249</sup>* larvae are indistinguishable from WT siblings.

To visualize cell-ECM adhesions with an endogenous protein in live zebrafish, we generated a *itgb1b-tdTomato* KI line (Fig. 2I). Consistent with prior studies (Martinez-Morales et al., 2009, Sidhaye and Norden, 2017), *Itgb1b*-tdTomato was clearly enriched at the basal membrane of optic cup cells at 28 hpf (Fig. 2J). We also confirmed prominent enrichment of *Itgb1b*-tdTomato in myotendinous junctions at the somite boundaries (Jülich et al., 2005) (Fig. 2K). These observations suggest that *itgb1b-tdTomato* faithfully reports the localization of *Itgb1b* in live zebrafish.

To establish a zebrafish model for membrane trafficking, we generated a KI line expressing N-terminally tagged eGFP-Rab11a. Live imaging revealed that eGFP-Rab11a was nearly ubiquitously expressed and enriched in epithelial organs (Fig. 3A, Movie 4). In the posterior intestine, eGFP-Rab11a was highly expressed and localized apically in lysosome-rich enterocytes (LREs) (Park et al., 2019) (Fig. 3B). Apical localization of eGFP-Rab11a in the intestine resembles that of endogenous Rab11a by immunostaining (Levic et al., 2020) (Fig. S4C-D). eGFP-Rab11a was detected in transverse sections of skeletal muscle, notochord sheath cells, and notochord vacuolated cells (Fig. 3C), where live imaging revealed dynamic movement of eGFP-Rab11a (Movie 5). Within lateral line neuromasts, eGFP-Rab11a expression was restricted to hair cells, where it was enriched apically near stereocilia of the apical membrane (Fig. 3D) and was also present at basal puncta that may represent contact sites from innervating neurons (Fig. 3D). Accordingly, we detected enriched expression of eGFP-Rab11a in tracts and projections of neurons that underlie neuromasts (Fig. 3E-F).

As a marker for the apical polarity complex we targeted aPKC, which is encoded by *prkci/has* (Horne-Badovinac et al., 2001, Peterson et al., 2001). In polarized IECs and pronephric duct cells (PN), eGFP-aPKC was enriched at the apical cortex (Fig. 3G). This localization closely resembled that of endogenous aPKC in WT larvae by immunostaining (Fig. S4E-F). Consistent with prior studies (Raman et al., 2016, Magre et al., 2019), eGFP-aPKC was present at apical microridges in periderm cells of the epidermis (Fig. 3H).

Having shown that proteins can be tagged endogenously we tested whether our KI lines can be used to determine their relative cellular abundance. To explore this question, we adapted a microscopy-based approach to measure the concentration of eGFP molecules on diffraction limited vesicles on zebrafish tissue sections to estimate the number of molecules per vesicle. While this technique is commonly used in *in vitro* models (Clayton, 2018, Marques et al., 2019, Escamilla-Ayala et al., 2020), quantitative imaging of animal tissues can be obscured by factors such as autofluorescence and light scattering. To establish baseline standards, we measured the photon emission of purified eGFP on zebrafish tissue sections. We collected intestinal sections of eGFP-negative larvae (Fig. 4A), incubated a solution of purified eGFP at low concentration, and then crosslinked eGFP particles to the tissue surface by fixation (Fig. 4B). We collected accumulated photon counts of eGFP particles and then photobleached them (Fig. 4C). During photobleaching we monitored signal intensity and inferred the original number of eGFP molecules in the particle based on the signal decay profile (Fig. 4D). Using this approach, we identified eGFP particles containing 1–3 molecules that exhibited a linear increase in photon emission (Fig. 4E-F). Next, we prepared eGFP-Rab11a KI larvae and performed single particle imaging of diffraction limited apical vesicles on tissue sections (Fig. 4G-H) using identical processing and imaging conditions as described above. Although Rab11a expression levels vary by more than 2-fold at the mRNA levels in LREs vs. IECs (Park et al., 2019), endogenously tagged eGFP-Rab11a concentration on apical vesicles did not change in proportion (Fig. 4I). However, the relative distribution profile for LREs did reveal an increase in the fraction of vesicles containing >3 molecules (Fig. 4J), possibly reflecting a pool of vesicles that function in protein uptake in these specialized enterocytes (Park et al., 2019).



Here we describe a simple and effective KI approach for zebrafish. While KI zebrafish lines have been generated to study promoter activity (Kimura et al., 2014, Hoshijima et al., 2016, Li et al., 2019), there are few published examples of C-terminally tagged KI fusion lines (Cronan and Tobin, 2019) and only one N-terminally tagged line (Wilson et al., 2021). This scarcity may reflect the highly error prone nature of HDR in zebrafish. Recently an endogenous tagging approach using short homology arms was reported for medaka (Seleit et al., 2021). While it is unclear if this approach can generate seamless integrations to tag endogenous proteins in zebrafish, the modifications reported for medaka KI (Seleit et al., 2021) may help to further optimize endogenous tagging in zebrafish. Our approach differs from existing methods because integration errors, such as INDELs, in non-coding regions can mediate expression of the tagged protein as integration boundaries are excluded by RNA splicing. A similar endogenous tagging approach was recently reported for cultured mammalian cells (Zhong et al., 2021). With our approach, we sought to minimize integration of undesired plasmid elements by utilizing PCR donor amplicons that only encode relevant functional elements. Following this approach, we generated stable zebrafish KI lines for several integral membrane and membrane associated proteins critical for epithelial development and cell physiology, and we used one of these lines to quantify the concentration of eGFP-Rab11a molecules on apical vesicles in different epithelial organs. The endogenously tagged zebrafish lines presented here improve accuracy and allow experimental approaches not feasible with traditional transgenic lines. These include the abilities to recapitulate expression patterns of endogenous genes and to precisely quantify protein levels using single particle imaging or related techniques (Wang et al., 2018). They also can facilitate uncovering protein interaction networks and dynamics without overexpression artifacts (Ahmed et al., 2018) and acute manipulation of protein function using conditional loss-of-function approaches (Daniel et al., 2018, Yamaguchi et al., 2019). One factor that can impact expression levels of endogenously tagged proteins is the 3' UTR used in the repair donor sequence. The 3' tagged lines shown here have exogenous polyA sequences that may alter transcript stability. Endogenous 3' UTR and polyA sequences can be substituted in 3' repair donors to recapitulate mRNA stability levels more accurately. By contrast, genes tagged with 5' insertions, such as *eGFP-rab11a*, will result in transcripts containing the endogenous 3'UTR that should provide endogenous expression levels. Finally, because our KI approach relies on splice donor and acceptor elements, our method can be adapted to generate internal insertions at precise codon positions for targets such as membrane proteins containing signal peptide sequences that cannot be tagged at their C-termini.

## Materials and methods

### Zebrafish maintenance

Zebrafish (*Danio rerio*) were used in accordance with Duke University Institutional Animal Care and Use Committee (IACUC) guidelines and NYU School of Medicine under the approval from protocol number 170105–02. Zebrafish stocks were maintained and bred as previously described (Westerfield, 2007). Genotypes were determined by PCR and DNA sequencing or phenotypic analysis. Male and female breeders from 3–18 months of age were used to generate fish for all experiments. 1–7 dpf zebrafish larvae from the Ekkwill (EK) or AB/TL background were used in this study. Strains generated in this study are: *TgKI(tjp1a-tdTomato)<sup>pd1224</sup>*, *TgKI(tjp1a-eGFP)<sup>pd1252</sup>*, *TgKI(cldn15la-tdTomato)<sup>pd1249</sup>*, *TgKI(itgb1b-tdTomato)<sup>sk108</sup>*, *TgKI(eGFP-rab11a)<sup>pd1244</sup>*, *TgKI(eGFP-prkci)<sup>pd1260</sup>*. Embryos and larvae were anesthetized with 0.4 mg/ml MS-222 (Sigma, A5040) dissolved in embryo media for handling when necessary.

### Generation of C-terminal PCR donors

We first generated a series of donor vectors to expedite production of C-terminal knock-in constructs. In the pUC19 vector backbone, we constructed a multiple cloning site, a fluorescent protein coding sequence or other tag lacking the start codon (eGFP, mLanYFP, mScarlet, tdTomato, p2A-QF2, p2A-eGFP, p2A-mScarlet, or p2A-Venus-PEST), a stop codon, a second multiple cloning site, and the zebrafish *ubb* poly-adenylation sequence. This fragment was flanked by forward and reverse PCR primer sites to generate PCR donor

amplicons for all targets using the same primers, pUC19\_forward 5'-GCGATTAAGTTGGGTAACGC-3' and pUC19\_reverse 5'- TCCGGCTCGTATGTTGTGTG-3'. A gene fragment spanning from the middle of the last intron through the last coding sequence codon of the exon was cloned into the donor vector in frame with the fluorescent protein coding sequence using the following primers: tjp1a-forward 5'-cttgctagcAGTTTCGATGACCACAGGGT-3', tjp1a-reverse 5'- cctctcgagGAAATGGTCAATAAGCACAGACA-3', cldn15la-forward 5'- cttccgcggGTTTCACGTCAGAAATTGTCCG-3', cldn15la-reverse 5'- cttctcgagGACGTAGGCTTTGGATGTTTC-3'. PCR donor amplicons were purified using the Nucleospin Gel and PCR Clean-up kit (Machery-Nagel, distributed by Takara Bio USA). PCR products were not gel purified. The final product was dried on column at 60°C for 10 minutes and then eluted with water and stored at -20°C. C-terminal donor vectors have been deposited to Addgene.

### Generation of N-terminal PCR donors for *rab11a*

A gene fragment spanning from 446 base pairs upstream from the 5' UTR through 491 base pairs downstream of the end of exon 1 was cloned into pCS2+ with the following primers: rab11a-forward 5'-cttctcgagGAACTTACGAGCTGGATTTGTGC-3' and rab11a-reverse 5'-ctttctagaTGACAGCGTCGGTCACAGTT-3'. A small multiple cloning site was added before the start codon of exon 1 by site directed mutagenesis (Q5 SDM Kit, New England Biolabs) using the primers rab11a-MCS-SDM-forward 5'- tactagttccATGGGGACACGAGACGAC-3' and rab11a-MCS-SDM-reverse 5'-agaccggtaggCTCGATCAAAACAAAAGCGC-3'. eGFP was cloned into the multiple cloning site using the primers GFP-forward 5'-cttaccggtgccgccaccATGGTGAGCAAGGGCGAGGA-3' and GFP-reverse 5'-cttactagtCTTGTACAGCTCGTCCATGCC-3'. The gRNA target sites used for genomic targeting were mutated in the donor plasmid using site directed mutagenesis with the primers: gRNA-1-SDM-forward 5'-aacagcgaaactGTCGCCTCCACTTTCCTT-3', gRNA-1-SDM-reverse 5'-atctccgctgtaGCACTGCAGTCTGTCTGT-3', gRNA-2-SDM-forward 5'-actcgagcagagCAAACAACTCCTGCTCTTC-3', gRNA-2-SDM-reverse 5'-cgagctagcataTTAGCTGGCCTTTACTGT-3'. PCR donors were generated as described above using the primers: rab11a-donor-forward 5'-GAACTTACGAGCTGGATTTGTGC-3' and rab11a-donor-reverse 5'-ctttctagaTGACAGCGTCGGTCACAGTT-3'. For ssDNA production in Fig. 1, PCR of the same donor plasmid was performed using the same primers, but the forward primer was phosphorylated. After PCR ssDNA was generated using the Guide-it Long ssDNA Production System (Takara Bio USA) using the manufacturer's recommendations. ssDNA was purified using the Nucleospin Gel and PCR Clean-up kit (Machery-Nagel, distributed by Takara Bio USA) with buffer NTC used as recommended by the manufacturer. ssDNA conversion was verified used gel electrophoresis and the product was stored at -80°C.

### Generation of N-terminal PCR donors for *prkci*

A gene fragment spanning from 488 base pairs upstream from the 5'UTR through 61 base pairs downstream from exon 1 was cloned into pDONR221 using a BP reaction (ThermoFisher) using the primers prkci-BP-forward 5'-GGGGACAAGTTTGTACAAAAAAGCAGGCTCctatctaggtatatgggccctc-3' and prkci-BP-reverse 5'-GGGGACCACTTTGTACAAGAAAGCTGGGTcgcaatcctgagaataagtgaga-3'. The gRNA target site in intron 1 was mutated by PCR during initial cloning (the reverse cloning primer was mutagenic), and the gRNA target site sequence was verified independently in a population of WT fish. Next a multiple cloning site was inserted before the start codon of exon 1 using the primers prkci-MCS-SDM-forward 5'-tactagttccATGCCCACGCTGCGGGAC-3' and prkci-MCS-SDM-reverse 5'-agaccggtaggTATGGACTATCCGTACTCCTGCTAGC-3'. eGFP was cloned to the site using the primers GFP-forward 5'-cttaccggtgccgccaccATGGTGAGCAAGGGCGAGG-3' and GFP-reverse 5'-cttactagtCTTGTACAGCTCGTCCATGCC-3'. PCR donors were generated as described above using the primers prkci-forward-donor 5'-tatctaggtatatgggccctc-3' and prkci-reverse-donor 5'-gcaatagtgcaataagtgaga-3'.

### Generation of plasmid donors for *itgb1b*

A genomic fragment spanning the last 29 bp of *itgb1b* exon 8 to the end of *itgb1b* exon 9 was cloned into the pUC19 plasmid (exon numbering is based on transcript ID: ENSDART00000161711.2). A linker sequence coding for amino acids GGPVAT was inserted after the codon for the last amino acid of *itgb1b* and the fragment was fused to the tdTomato coding sequence followed by the SV40 polyA signal sequence. A gRNA target site was designed to target both the donor plasmid, thereby linearizing it in the intron, and the endogenous genomic intron.

### Production of guide RNA (gRNA)

Guide RNA (gRNA) target sites were identified using CRISPRscan (Moreno-Mateos et al., 2015) and gRNAs were synthesized by *in vitro* transcription using an oligo-based template method (Yin et al., 2015) using the MEGAshortscript T7 Transcription Kit (ThermoFisher). gRNAs were precipitated by ammonium acetate/isopropanol, resuspended in water, and stored at -80°C. For *itgb1b*, crRNA and the tracrRNA were purchased from IDT, and the crRNA was designed using the Custom Alt-R CRISPR-Cas9 guide RNA Design Tool (IDT). gRNA target sites used in this study were: *cldn15la*, 5'-GtTTCACGTCAGAAATTGTCGGG-3' and 5'-GGATTTCTCTAGATTATGACCGG-3'; *prkci*, 5'-GcATTCTCACTTATTCTCAACGG-3'; *rab11a*, 5'-gGCAGCGGAGAGGACAGCGACGG-3' and 5'-CCGGCTAGCTCACTTCGAGCAcC-3'; *tjp1a*, 5'-tGCGAATAGGGGTTGATAATGGG-3' and 5'-GaGTTTCGATGACCACAGGGTGG-3'; crRNA for *itgb1b*, 5'-GGAGGTCTTGATGTAGGATT-3'.

### Microinjections and visual screening

Early 1-cell stage embryos were injected with 1-2 nL of a knock-in cocktail consisting of gRNA (final concentration 30-50 pg/nL), dsDNA or ssDNA PCR donors (final concentration 5-10 pg/nL) Cas9 protein tagged with a nuclear localization sequence (PNA Bio CP-01) (final concentration 300-500 pg/nL), and phenol red (final concentration 0.05%). We observed mortality rates of 10-20% for dsDNA-injected embryos and 40-50% for ssDNA-injected embryos. For *itgb1b*, the injection mix containing Cas9-NLS protein, crRNA, tracrRNA and the plasmid harboring the *itgb1b* targeting cassette was heat-activated at 37°C and injected into one-cell stage wild-type embryos. Embryos were visually screened daily between 1–5 dpf for fluorescence using an Axio Zoom V16 microscope (Zeiss). Embryos suspected of showing fluorescence were mounted in 0.7% low melting point agarose and imaged by confocal microscopy on a Leica SP8 microscope using an HC FLUOTAR VISIR 25x/0.95 NA water immersion objective (Leica). Positive embryos were recovered from anesthesia and raised to adulthood.

### Isolation of stable alleles

Injected embryos showing expression of fluorescently tagged proteins were raised and crossed to WT fish. The positive F1 embryos were raised and crossed to WT fish. The integration site was then sequenced and the lines were designated allele numbers. With the exception of Fig. S1, all imaging data presented are from stable animals of the F1 or greater generation.

### Imaging and image processing

All imaging was performed on a Leica SP8 confocal microscope. Live imaging was conducted with a FLUOTAR VISIR 25x/0.95 NA or HC PL APO CS2 20x/0.75 water immersion objectives (Leica), and cross sections with an HC PL APO CS2 63x/1.40 oil immersion objective (Leica). All fluorescent proteins for KI lines were imaged directly without additional antibody labeling. Whole animals were imaged in tiling mode and the data were stitched in Leica LAS software. Imaging data were processed in ImageJ/FIJI (NIH) to prepare 3D reconstructions using native plugins. To enhance visualization of some images, data were pseudo-colored using default lookup tables (LUTs) in ImageJ/FIJI. LUTs are described in the figure legends and scales shown in figure panels where appropriate. Post-processing for linear changes in brightness were performed in photoshop using the levels tool.

## Single particle imaging

6 dpf GFP-negative larvae were fixed in 4% paraformaldehyde in PBS pH 7.5 overnight at 4°C, rinsed in PBS, and then embedded in 5% low melting point agarose. 200 µm sections were collected using a Leica VT1000S vibratome (Levic et al., 2020). Sections were incubated with 340 ng/mL purified eGFP, which was generated as we previously described (Park et al., 2019), overnight at 4°C. The solution was then gently aspirated and then sections were fixed in 4% paraformaldehyde in PBS pH 7.5 for 30 minutes at room temperature. Sections were rinsed in PBS and then mounted on glass slides in 90% glycerol buffered with 10 mM Tris, pH 8 with 1% N propyl-gallate added. Sections were imaged near the coverslip surface with a Leica SP8 confocal microscope using an HC PL APO CS2 63x/1.40 oil immersion objective. Excitation was performed with a 20 mW 488 nm laser operating at 0.2% power, and scans were performed at 400 Hz with a pixel size of 50 nm. Emission spectra were collected from 498-550 nm using a HyD detector operating in photon counting mode with 10x line accumulation and at 10% gain. Experimental samples (eGFP-Rab11a larvae) were processed identically. Raw 12-bit images were analyzed in ImageJ/FIJI. Photon counts of 5 pixel<sup>2</sup> ROIs of eGFP particles were collected and analyzed by linear regression using Graphpad Prism. Photon counts experimental samples were interpolated from the linear regression analysis of purified eGFP particles to infer the number of eGFP molecules per vesicle.

## Acknowledgements

We thank the Duke Zebrafish Core, Joseph Proietti, and Sam Pirani for excellent fish care and maintenance. Jieun Esther Park provided purified eGFP. We also thank Xiaolei Wang, Ian Macara, and Kristen Kwan for helpful discussions. The use of the NYULH DART Microscopy Laboratory (P30CA016087) is gratefully acknowledged.

## Competing interests

The authors declare no competing interests.

## Author contributions

D.S.L. developed the methodology for N-terminal endogenous tagging and C-terminal endogenous tagging, generated the *cldn15la*, *tjp1a*, *prkci*, and *rab11a* zebrafish lines, and collected imaging data. N.Y. developed the methodology for C-terminal tagging using a plasmid as a repair donor, generated the *itgb1b* zebrafish line, and collected imaging data. S.W. collected imaging data. D.S.L. wrote the manuscript with input from all authors. M.B. and H.K. supervised the project.

## Funding

This work was supported by NIH grants DK121007 and DK113123 (to M.B.), and NS102322 (to H.K.). D.S.L. was supported by Duke Training Grant in Digestive Diseases and Nutrition Grant DK007568. N.Y. was supported by a NYSTEM institutional training grant C322560GG and by an American Heart Association fellowship 20PRE35180164. M.B. is an HHMI Faculty Scholar.



## Data availability

C-terminal knock-in donor vectors have been deposited to Addgene. Zebrafish lines will be deposited to ZIRC, but in the interim they are available from our labs upon request to the corresponding author. Sequence files describing the genomic integration sites for all KI alleles are provided as supplementary Files 1-8. A detailed protocol of our endogenous tagging method is provided as a supplementary File 9.

## References

- AHMED, S. M., NISHIDA-FUKUDA, H., LI, Y., MCDONALD, W. H., GRADINARU, C. C. & MACARA, I. G. 2018. Exocyst dynamics during vesicle tethering and fusion. *Nature Communications*, 9, 5140.
- ALVERS, A. L., RYAN, S., SCHERZ, P. J., HUISKEN, J. & BAGNAT, M. 2014. Single continuous lumen formation in the zebrafish gut is mediated by smoothened-dependent tissue remodeling. *Development*, 141, 1110-9.
- BUSSMANN, J. & SCHULTE-MERKER, S. 2011. Rapid BAC selection for tol2-mediated transgenesis in zebrafish. *Development*, 138, 4327-4332.
- CHANDLER, K. J., CHANDLER, R. L., BROECKELMANN, E. M., HOU, Y., SOUTHARD-SMITH, E. M. & MORTLOCK, D. P. 2007. Relevance of BAC transgene copy number in mice: transgene copy number variation across multiple transgenic lines and correlations with transgene integrity and expression. *Mammalian Genome*, 18, 693-708.
- CLAYTON, A. H. 2018. Fluorescence-based approaches for monitoring membrane receptor oligomerization. *J Biosci*, 43, 463-469.
- CRONAN, M. R. & TOBIN, D. M. 2019. Endogenous Tagging at the cdh1 Locus for Live Visualization of E-Cadherin Dynamics. *Zebrafish*, 16, 324-325.
- DANIEL, K., ICHA, J., HORENBURG, C., MÜLLER, D., NORDEN, C. & MANSFELD, J. 2018. Conditional control of fluorescent protein degradation by an auxin-dependent nanobody. *Nature Communications*, 9.
- DEWARI, P. S., SOUTHGATE, B., MCCARTEN, K., MONOGAROV, G., O'DUIBHIR, E., QUINN, N., TYRER, A., LEITNER, M.-C., PLUMB, C., KALANTZAKI, M., BLIN, C., FINCH, R., BRESSAN, R. B., MORRISON, G., JACOBI, A. M., BEHLKE, M. A., VON KRIEGSHEIM, A., TOMLINSON, S., KRIJGSVELD, J. & POLLARD, S. M. 2018. An efficient and scalable pipeline for epitope tagging in mammalian stem cells using Cas9 ribonucleoprotein. *eLife*, 7.
- DICKINSON, D. J., PANI, A. M., HEPPERT, J. K., HIGGINS, C. D. & GOLDSTEIN, B. 2015. Streamlined Genome Engineering with a Self-Excising Drug Selection Cassette. *Genetics*, 200, 1035-1049.
- ESCAMILLA-AYALA, A. A., SANNERUD, R., MONDIN, M., POERSCH, K., VERMEIRE, W., PAPARELLI, L., BERLAGE, C., KOENIG, M., CHAVEZ-GUTIERREZ, L., ULBRICH, M. H., MUNCK, S., MIZUNO, H. & ANNAERT, W. 2020. Super-resolution microscopy reveals majorly mono- and dimeric presenilin1/gamma-secretase at the cell surface. *Elife*, 9.
- FUENTES, F., REYNOLDS, E., LEWELLIS, S. W., VENKITESWARAN, G. & KNAUT, H. 2016. A Plasmid Set for Efficient Bacterial Artificial Chromosome (BAC) Transgenesis in Zebrafish. *G3 Genes/Genomes/Genetics*, 6, 829-834.
- GAO, Y., HISEY, E., BRADSHAW, T. W. A., ERATA, E., BROWN, W. E., COURTLAND, J. L., UEZU, A., XIANG, Y., DIAO, Y. & SODERLING, S. H. 2019. Plug-and-Play Protein Modification Using Homology-Independent Universal Genome Engineering. *Neuron*, 103, 583-597.e8.
- GIBSON, T. J., SEILER, M. & VEITIA, R. A. 2013. The transience of transient overexpression. *Nature Methods*, 10, 715-721.
- HORNE-BADOVINAC, S., LIN, D., WALDRON, S., SCHWARZ, M., MBAMALU, G., PAWSON, T., JAN, Y.-N., STAINIER, D. Y. R. & ABDELILAH-SEYFRIED, S. 2001. Positional cloning of *heart and soul* reveals multiple roles for PKC; in zebrafish organogenesis. *Current Biology*, 11, 1492-1502.
- HOSHIJIMA, K., JURYNEC, M. J. & GRUNWALD, D. J. 2016. Precise Editing of the Zebrafish Genome Made Simple and Efficient. *Dev Cell*, 36, 654-67.

- HOWE, D. G., RAMACHANDRAN, S., BRADFORD, Y. M., FASHENA, D., TORO, S., EAGLE, A., FRAZER, K., KALITA, P., MANI, P., MARTIN, R., MOXON, S. T., PADDOCK, H., PICH, C., RUZICKA, L., SCHAPER, K., SHAO, X., SINGER, A., VAN SLYKE, C. E. & WESTERFIELD, M. 2021. The Zebrafish Information Network: major gene page and home page updates. *Nucleic Acids Res*, 49, D1058-d1064.
- JÜLICH, D., GEISLER, R. & HOLLEY, S. A. 2005. Integrin $\alpha$ 5 and Delta/Notch Signaling Have Complementary Spatiotemporal Requirements during Zebrafish Somitogenesis. *Developmental Cell*, 8, 575-586.
- KIMURA, Y., HISANO, Y., KAWAHARA, A. & HIGASHIJIMA, S. 2014. Efficient generation of knock-in transgenic zebrafish carrying reporter/driver genes by CRISPR/Cas9-mediated genome engineering. *Sci Rep*, 4, 6545.
- KOLES, K., YEH, A. R. & RODAL, A. A. 2016. Tissue-specific tagging of endogenous loci in *Drosophila melanogaster*. *Biology Open*, 5, 83-89.
- KWAN, K. M., FUJIMOTO, E., GRABHER, C., MANGUM, B. D., HARDY, M. E., CAMPBELL, D. S., PARANT, J. M., YOST, H. J., KANKI, J. P. & CHIEN, C.-B. 2007. The Tol2kit: A multisite gateway-based construction kit for Tol2 transposon transgenesis constructs. *Developmental Dynamics*, 236, 3088-3099.
- LEVIC, D. S., RYAN, S., MARJORAM, L., HONEYCUTT, J., BAGWELL, J. & BAGNAT, M. 2020. Distinct roles for luminal acidification in apical protein sorting and trafficking in zebrafish. *J Cell Biol*, 219.
- LI, W., ZHANG, Y., HAN, B., LI, L., LI, M., LU, X., CHEN, C., LU, M., ZHANG, Y., JIA, X., ZHU, Z., TONG, X. & ZHANG, B. 2019. One-step efficient generation of dual-function conditional knockout and geno-tagging alleles in zebrafish. *eLife*, 8.
- MAGRE, I., FANDADE, V., DAMLE, I., BANERJEE, P., YADAV, S. K., SONAWANE, M. & JOSEPH, J. 2019. Nup358 regulates microridge length by controlling SUMOylation-dependent activity of aPKC in zebrafish epidermis. *Journal of Cell Science*, 132.
- MARQUES, P. E., NYEGAARD, S., COLLINS, R. F., TROISE, F., FREEMAN, S. A., TRIMBLE, W. S. & GRINSTEIN, S. 2019. Multimerization and Retention of the Scavenger Receptor SR-B1 in the Plasma Membrane. *Dev Cell*, 50, 283-295 e5.
- MARTINEZ-MORALES, J. R., REMBOLD, M., GREGER, K., SIMPSON, J. C., BROWN, K. E., QUIRING, R., PEPPERKOK, R., MARTIN-BERMUDO, M. D., HIMMELBAUER, H. & WITTBRODT, J. 2009. ooplano-mediated basal constriction is essential for optic cup morphogenesis. *Development*, 136, 2165-2175.
- MORENO-MATEOS, M. A., VEJNAR, C. E., BEAUDOIN, J.-D., FERNANDEZ, J. P., MIS, E. K., KHOKHA, M. K. & GIRALDEZ, A. J. 2015. CRISPRscan: designing highly efficient sgRNAs for CRISPR-Cas9 targeting in vivo. *Nature Methods*, 12, 982-988.
- NAVIS, A., MARJORAM, L. & BAGNAT, M. 2013. Cftr controls lumen expansion and function of Kupffer's vesicle in zebrafish. *Development*, 140, 1703-1712.
- PARK, J., LEVIC, D. S., SUMIGRAY, K. D., BAGWELL, J., EROGLU, O., BLOCK, C. L., EROGLU, C., BARRY, R., LICKWAR, C. R., RAWLS, J. F., WATTS, S. A., LECHLER, T. & BAGNAT, M. 2019. Lysosome-Rich Enterocytes Mediate Protein Absorption in the Vertebrate Gut. *Dev Cell*, 51, 7-20 e6.
- PENG, Y., CLARK, K. J., CAMPBELL, J. M., PANETTA, M. R., GUO, Y. & EKKER, S. C. 2014. Making designer mutants in model organisms. *Development*, 141, 4042-4054.
- PETERSON, R. T., MABLY, J. D., CHEN, J.-N. & FISHMAN, M. C. 2001. Convergence of distinct pathways to heart patterning revealed by the small molecule concentramide and the mutation heart-and-soul. *Current Biology*, 11, 1481-1491.
- RAMAN, R., DAMLE, I., ROTE, R., BANERJEE, S., DINGARE, C. & SONAWANE, M. 2016. aPKC regulates apical localization of Lgl to restrict elongation of microridges in developing zebrafish epidermis. *Nature Communications*, 7, 11643.
- RANAWAKAGE, D. C., OKADA, K., SUGIO, K., KAWAGUCHI, Y., KUNINOBU-BONKOHARA, Y., TAKADA, T. & KAMACHI, Y. 2021. Efficient CRISPR-Cas9-Mediated Knock-In of Composite Tags in Zebrafish Using Long ssDNA as a Donor. *Frontiers in Cell and Developmental Biology*, 8.
- RODRIGUEZ-FRATICELLI, A. E., BAGWELL, J., BOSCH-FORTEA, M., BONCOMPAIN, G., REGLERO-REAL, N., GARCIA-LEON, M. J., ANDRES, G., TORIBIO, M. L., ALONSO, M. A., MILLAN, J., PEREZ, F., BAGNAT, M. & MARTIN-BELMONTE, F. 2015. Developmental regulation of apical endocytosis controls epithelial patterning in vertebrate tubular organs. *Nat Cell Biol*, 17, 241-50.
- SELEIT, A., AULEHLA, A. & PAIX, A. 2021. Endogenous protein tagging in medaka using a simplified CRISPR/Cas9 knock-in approach. *bioRxiv*, 2021.07.29.454295.

- SIDHAYE, J. & NORDEN, C. 2017. Concerted action of neuroepithelial basal shrinkage and active epithelial migration ensures efficient optic cup morphogenesis. *eLife*, 6.
- WANG, J., YIN, Y., LAU, S., SANKARAN, J., ROTHENBERG, E., WOHLAND, T., MEIER-SCHELLERSHEIM, M. & KNAUT, H. 2018. Anosmin1 Shuttles Fgf to Facilitate Its Diffusion, Increase Its Local Concentration, and Induce Sensory Organs. *Dev Cell*, 46, 751-766.e12.
- WESTERFIELD, M. 2007. *THE ZEBRAFISH BOOK, 5th Edition; A guide for the laboratory use of zebrafish (Danio rerio)*, University of Oregon Press.
- WIERSON, W. A., WELKER, J. M., ALMEIDA, M. P., MANN, C. M., WEBSTER, D. A., TORRIE, M. E., WEISS, T. J., KAMBAKAM, S., VOLLBRECHT, M. K., LAN, M., MCKEIGHAN, K. C., LEVEY, J., MING, Z., WEHMEIER, A., MIKELSON, C. S., HALTOM, J. A., KWAN, K. M., CHIEN, C.-B., BALCIUNAS, D., EKKER, S. C., CLARK, K. J., WEBBER, B. R., MORIARITY, B. S., SOLIN, S. L., CARLSON, D. F., DOBBS, D. L., MCGRIL, M. & ESSNER, J. 2020. Efficient targeted integration directed by short homology in zebrafish and mammalian cells. *eLife*, 9, e53968.
- WILSON, M. H., EKKER, S. C. & FARBER, S. A. 2021. Imaging cytoplasmic lipid droplets in vivo with fluorescent perilipin 2 and perilipin 3 knock-in zebrafish. *eLife*, 10, e66393.
- YAMAGUCHI, N., COLAK-CHAMPOLLION, T. & KNAUT, H. 2019. zGrad is a nanobody-based degron system that inactivates proteins in zebrafish. *eLife*, 8.
- YIN, L., JAO, L.-E. & CHEN, W. 2015. *Generation of Targeted Mutations in Zebrafish Using the CRISPR/Cas System*. Springer New York.
- ZHONG, H., CEBALLOS, C. C., MASSENGILL, C. I., MUNIAK, M. A., MA, L., QIN, M., PETRIE, S. K. & MAO, T. 2021. High-fidelity, efficient, and reversible labeling of endogenous proteins using CRISPR-based designer exon insertion. *eLife*, 10.
- ZIHNI, C., MILLS, C., MATTER, K. & BALDA, M. S. 2016. Tight junctions: from simple barriers to multifunctional molecular gates. *Nature Reviews Molecular Cell Biology*, 17, 564-580.

## Figures

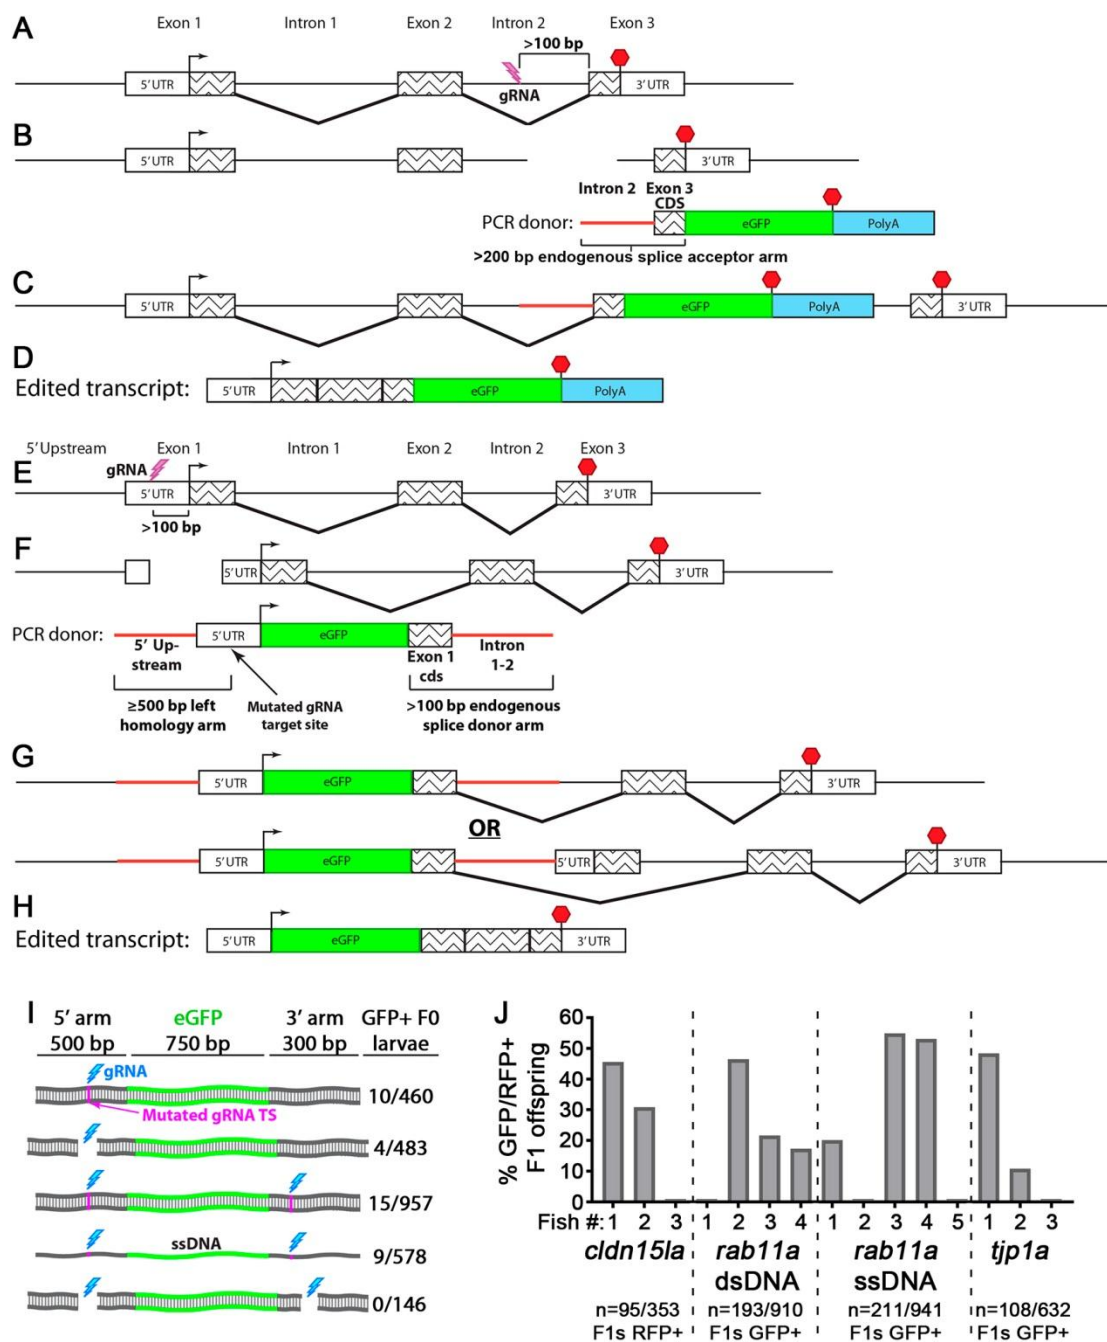

**Figure 1. Knock-in tagging in zebrafish using splice donor and acceptor arms. (A-D)** C-terminal endogenous tagging strategy. An intron 5' to the last exon is targeted for a dsDNA break **(A)** and integration of a PCR repair donor containing a 5' splice acceptor element **(B)**. mRNA splicing mediates expression of the tagged protein **(C-D)**. **(E-H)** N-terminal endogenous tagging strategy. A non-coding region 5' to the start codon is targeted for a dsDNA break **(E)** and integration of a PCR repair donor containing a 5' homology arm and 3' splice donor element **(F)**. mRNA splicing mediates expression of the tagged protein **(G-H)**. **(I)** 1-cell stage embryos were injected with different *rab11a* knock-in (KI) cocktails and visually screened. Cyan bolt, gRNA target site; magenta line, mutated PAM site in repair donor; ssDNA, single-stranded DNA. Numbers to the right indicate the proportion of GFP+ surviving larvae. **(J)** 1-cell stage embryos were injected with KI cocktails for different genes and then visually screened. GFP/RFP+ F0 fish were outcrossed, and F1 progeny were visually screened. Data plotted indicate the levels of mosaicism present in the F0 generation.



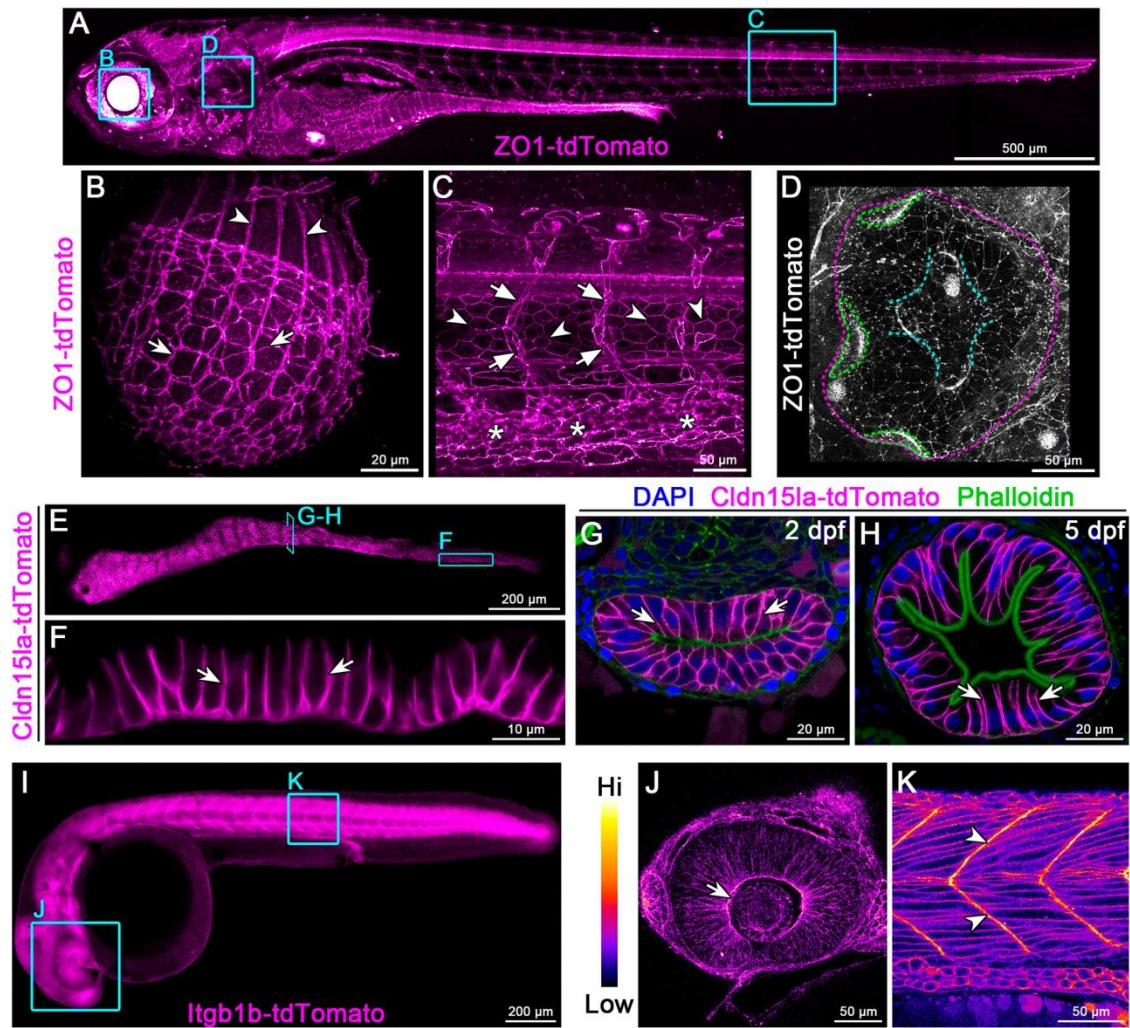

**Figure 2. Endogenous C-terminal tagging of ZO1, Cldn15la, and integrin  $\beta$ 1b.** (A-D) Live 3d reconstructions of *TgKl(tpj1a-tdTomato)*<sup>pd1224</sup> heterozygous larvae. Cyan boxes are representative ROIs for panels B-D. Panel B: arrows, lens epithelial cells; arrowheads, lens fiber cells. Panel C: arrows, intersegmental vessels; arrowheads, notochord sheath cells; asterisks, caudal vein plexus. Panel D: magenta dotted line, otic capsule; green dotted lines, cristae; cyan dotted lines, canals and septum. Animals are 7 dpf (A), 5 dpf (B), and 3 dpf (C-D). Scale bars are 500  $\mu$ m (A), 20  $\mu$ m (B), and 50  $\mu$ m (C-D). (E-F) Live imaging of the intestine of a 7 dpf *TgKl(cldn15la-tdTomato)*<sup>pd1249</sup> heterozygous larva. Arrows, intestinal epithelial cell (IEC) basolateral membrane. Scale bars are 200  $\mu$ m (E) and 10  $\mu$ m (F). (G-H) Transverse sections of the intestine at stages of lumen opening (2 dpf) (G) and onset of larval feeding (5 dpf) (H). Arrows, IEC basolateral membrane. Scale bars are 20  $\mu$ m. (I-K) Live imaging of a 28 hpf *TgKl(itgb1b-tdTomato)*<sup>sk108</sup> heterozygous embryo. Cyan boxes are representative ROIs for panels J-K, which are pseudo-colored according to the look-up table (LUT) scale shown. Panel J: arrow, optic cup basolateral membrane. Panel K: arrowheads, myotendinous junctions. Scale bars are 200  $\mu$ m (I) and 50  $\mu$ m (J-K).

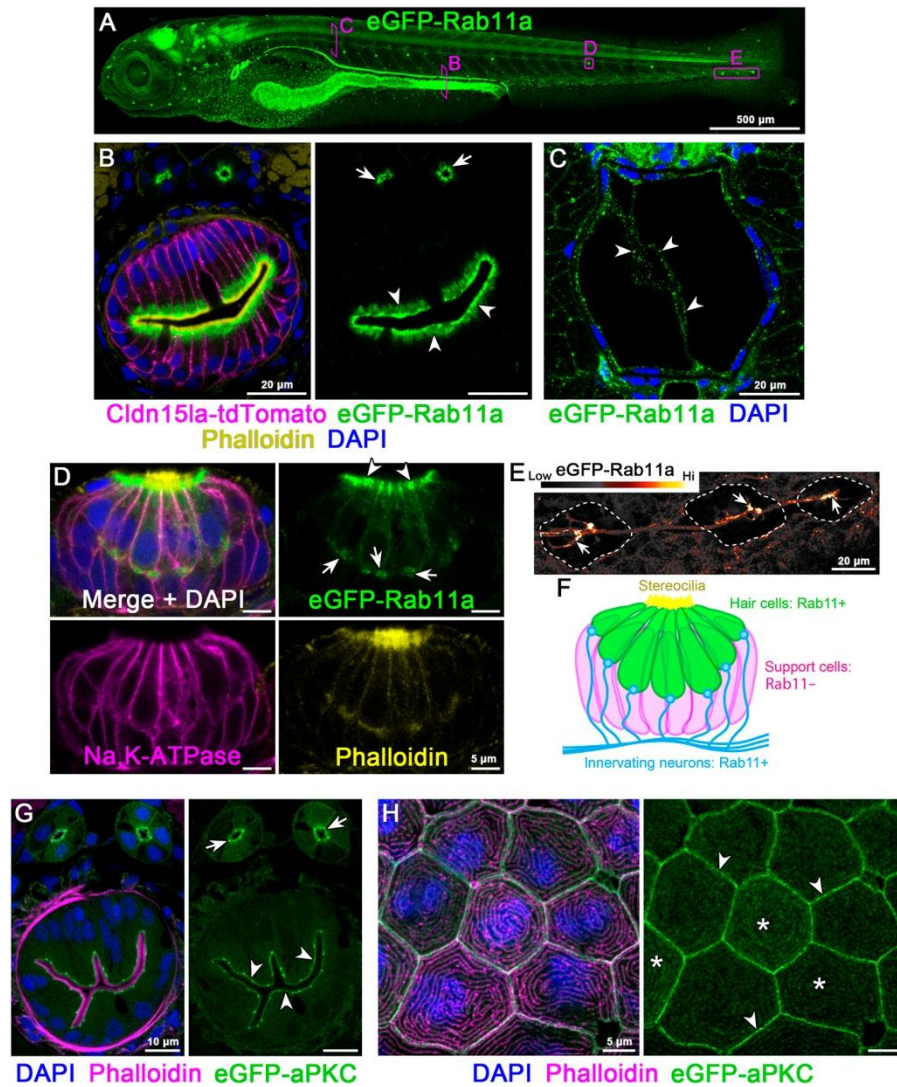

**Figure 3. Endogenous N-terminal tagging of Rab11a and aPKC.** (A) Live 3d reconstruction of 5 dpf *TgKI(eGFP-rab11a)<sup>pd1244</sup>* heterozygous larva. Magenta boxes show representative ROIs for panels B-E. Scale bar is 500  $\mu$ m. (B) Transverse section through the posterior mid-intestine (LREs, arrowheads) and pronephric ducts (arrows). Scale bars are 20  $\mu$ m. (C) Transverse section through the notochord. Arrowheads, notochord vacuolated cells. Scale bars is 20  $\mu$ m. (D) Whole mount image of a neuromast. Arrowheads, apical cytoplasm; arrows, basal cytoplasm. Scale bars are 5  $\mu$ m. (E) Live image of neurons innervating lateral line neuromasts (dotted line). Image is pseudo-colored according to the LUT scale shown. Arrows, neuronal tracts. Scale bars is 20  $\mu$ m. (F) Schematic of Rab11a expression within neuromasts. (G-H) Transverse sections of *TgKI(eGFP-prkci)<sup>pd1260</sup>* heterozygous larvae. (G) Transverse section of the mid-intestine. Arrowheads, IEC apical cortex; arrows, pronephric duct apical cortex. Scale bars are 10  $\mu$ m. (H) Localization of eGFP-aPKC in periderm cells. Arrowheads, cell cortex; asterisks, apical microridges, Scale bars are 5  $\mu$ m.

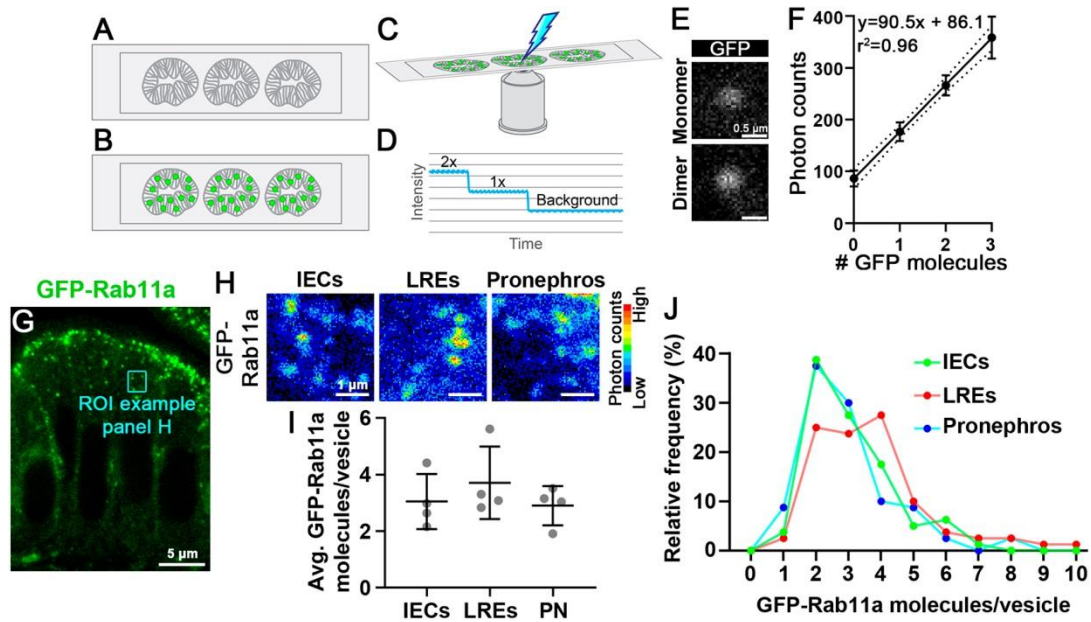

Figure 4. **Tissue-specific Rab11a expression levels do not strongly affect its concentration on apical vesicles of the intestine or pronephros.** (A-F) Single particle imaging of zebrafish tissue sections. Intestinal sections of GFP-negative larvae (A) are incubated with purified eGFP (B), and photon counts are collected and photobleached to background-level intensity (C). eGFP particle concentrations are inferred by the decay profile. (E-F) Single particle photon count imaging and linear regression analysis of purified eGFP photon emission from intestinal sections. Scale bars are 0.5  $\mu\text{m}$ . (G) Transverse section of *TgKl(eGFP-rab11a)<sup>pd1244</sup>* IECs. Cyan box shows a representative ROI of apical vesicles. (H) Pseudo-colored photon count images of apical vesicles of IECs, lysosome-rich enterocytes (LREs), and pronephric duct epithelial cells (PN). Scale bars are 1  $\mu\text{m}$ . (I) Average eGFP-Rab11a concentration values from apical vesicles. Data points are average values from tissue sections of individual larvae.  $n=4$  larvae for each organ (20 vesicles per animal). Data were not significantly different (One-way ANOVA). (J) Relative frequency plot of the data used for panel I. LREs vs. IECs,  $p<0.05$ ; LREs vs. PN,  $p<0.01$ ; IECs vs. PN, not significant (One-way ANOVA).  $n=80$  vesicles per organ.



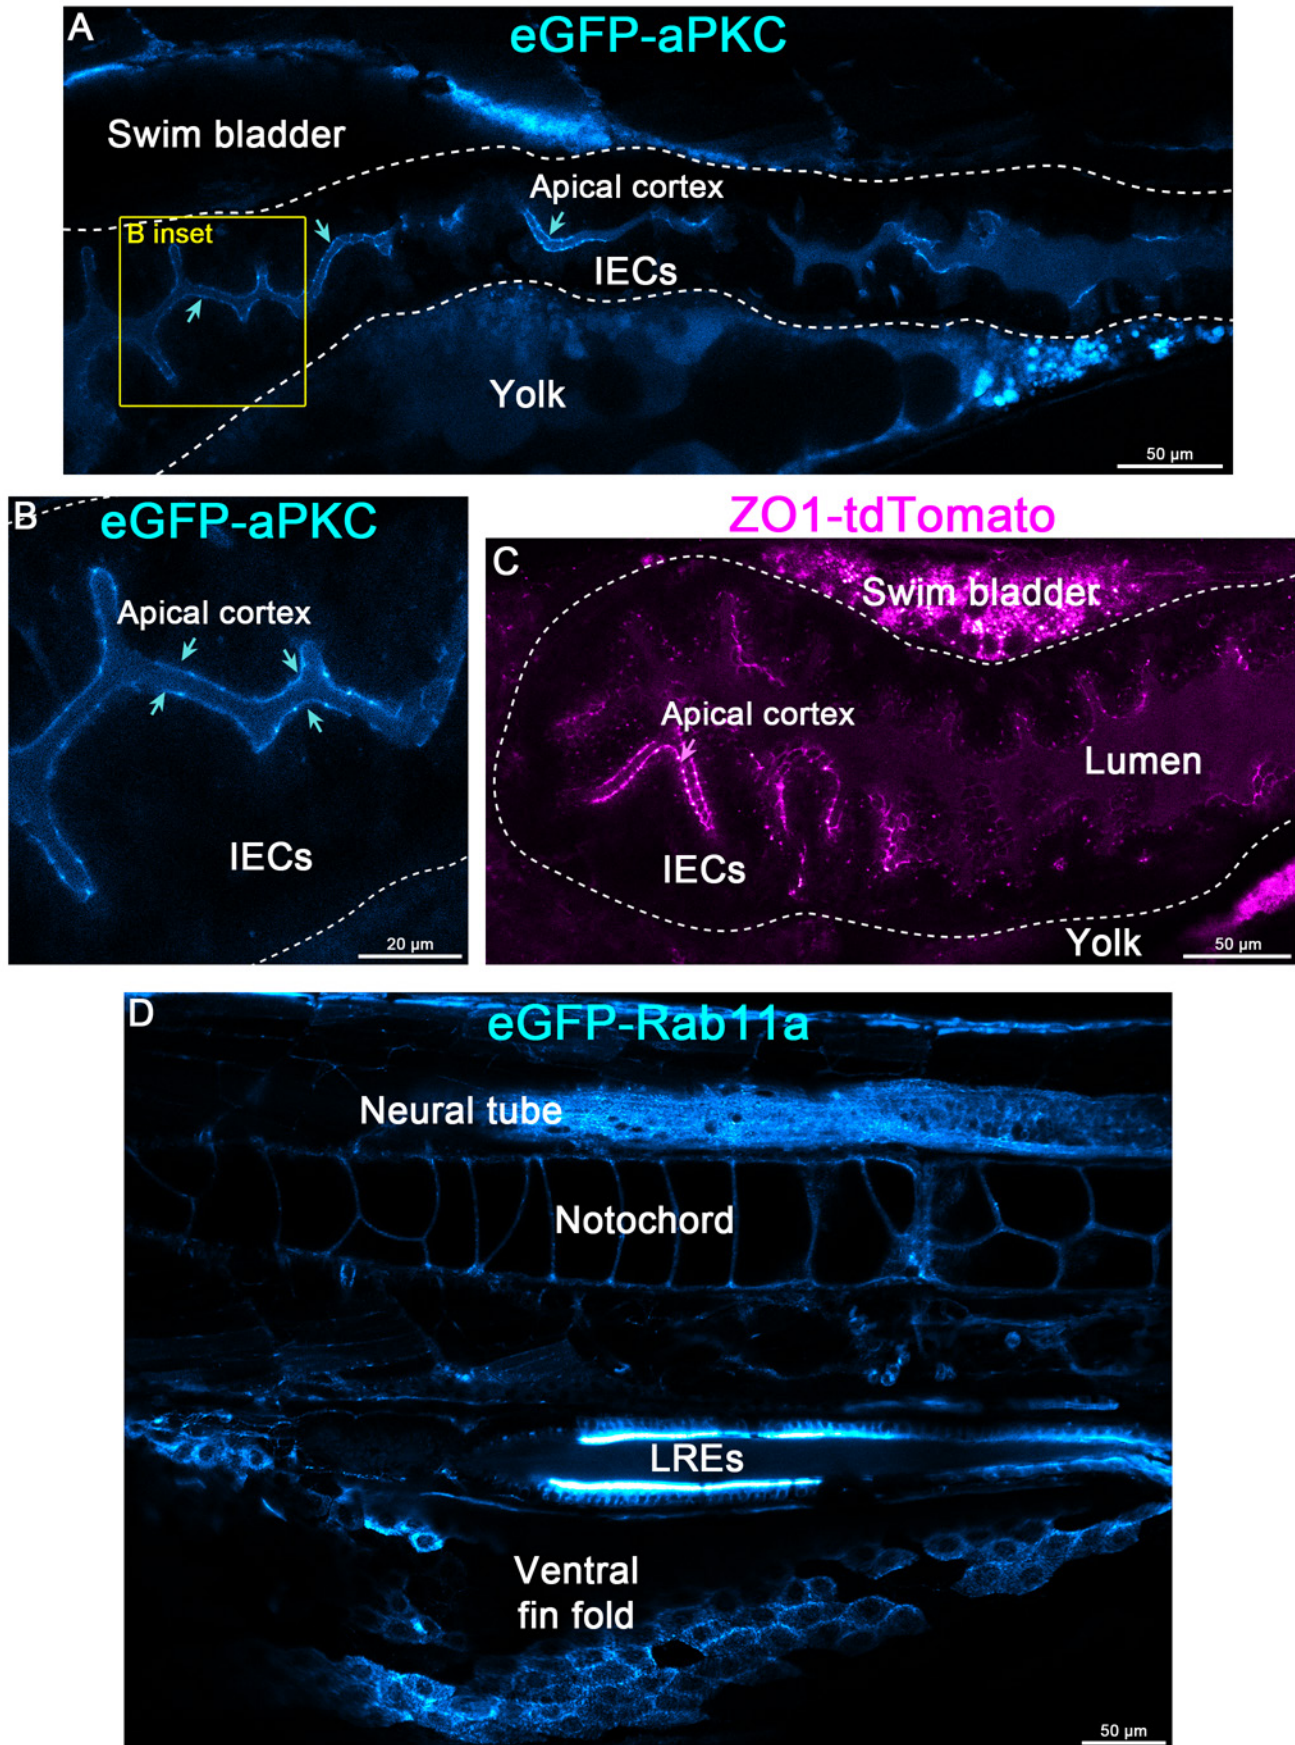



**Fig. S1. Examples of mosaicism in injected embryos (F0s).** **(A-B)** Live imaging of a 5 dpf eGFP-aPKC (encoded by *prkci/has*) F0 larva. Arrows point to the apical cortex. Scale bars are 50  $\mu\text{m}$  **(A)** and 20  $\mu\text{m}$  **(B)**. **(C)** Live imaging of a 5 dpf ZO1-tdTomato (encoded by *tjp1a*) F0 larva. Arrow points to the apical cortex. Scale bars is 50  $\mu\text{m}$ . The dotted line marks the intestinal epithelium. **(D)** Live imaging of a 5 dpf eGFP-Rab11a F0 larva. The broad spatial expression patterns and high expression levels of eGFP-Rab11a allow for simple visual screening to test PCR donor variants to optimize endogenous tagging. Scale bars are 50  $\mu\text{m}$ . Images were pseudo-colored with the ImageJ/FIJI Cyan Hot or Magenta Hot LUT to enhance visualization of lower expressing cell-types.

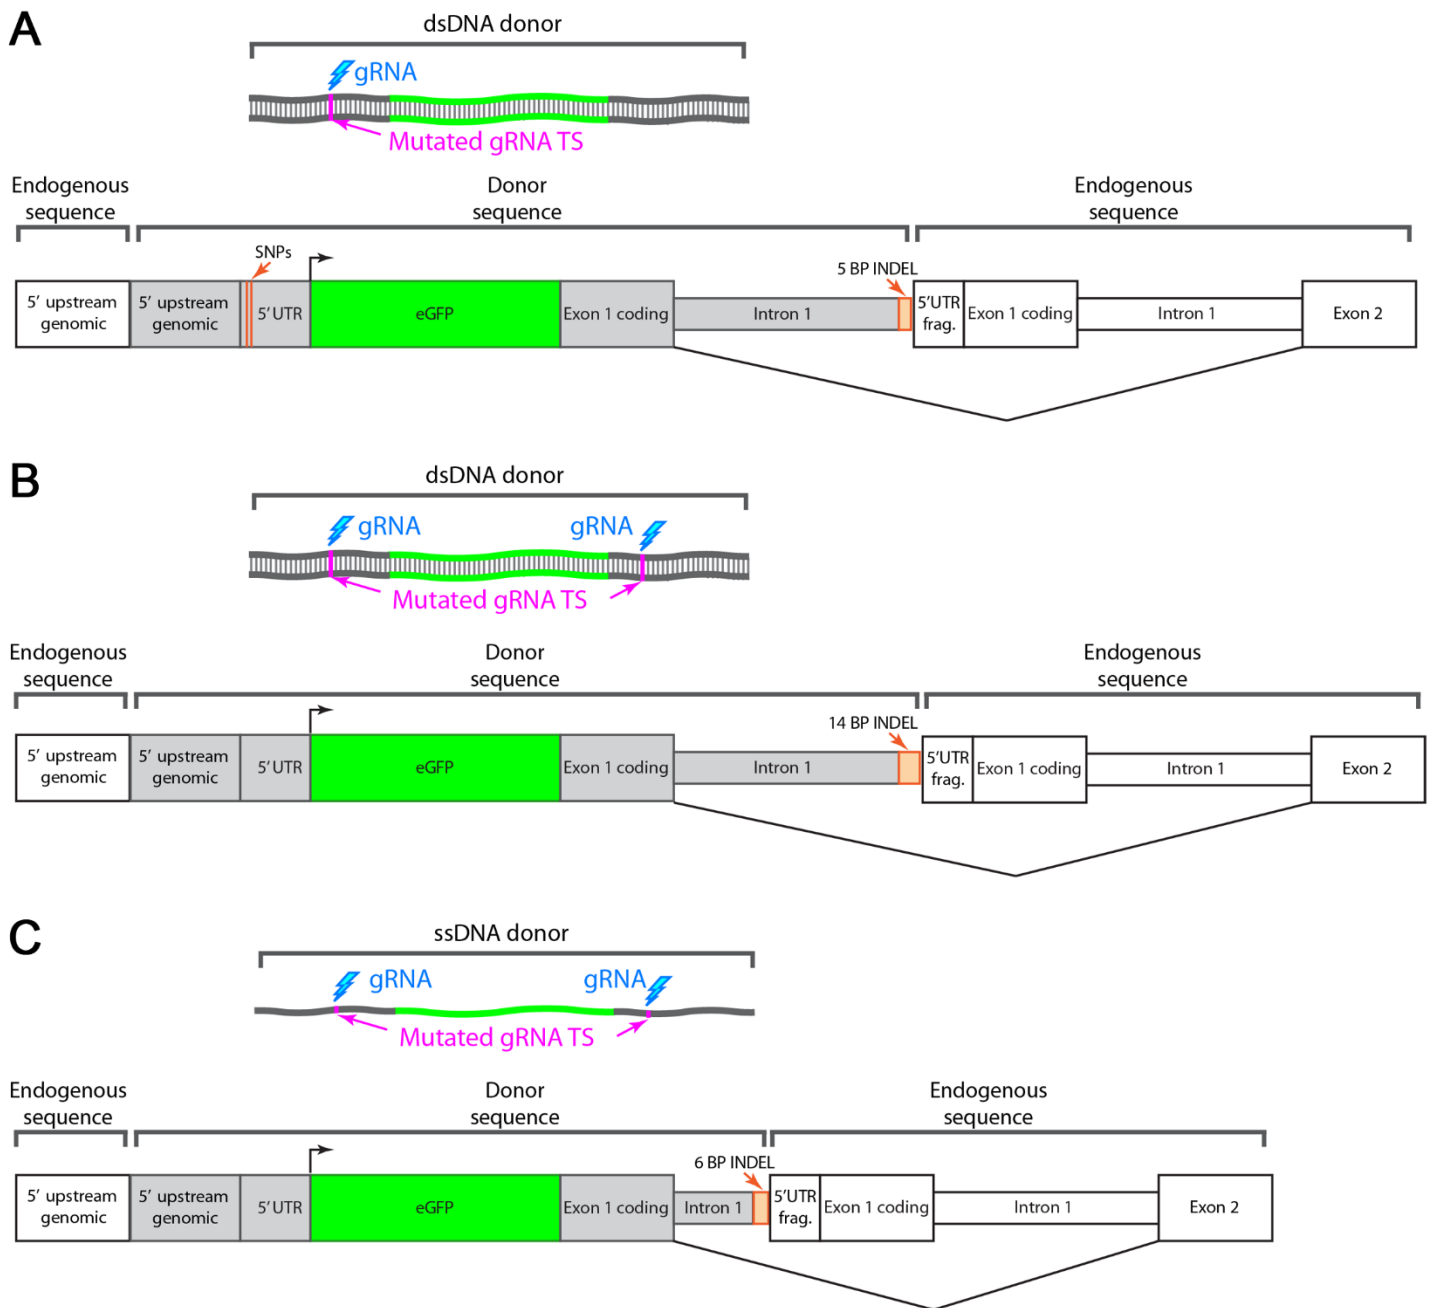

**Fig. S2. Comparison of eGFP-rab11a donor integration sites in independently generated alleles. (A-C)** 1-cell stage embryos were injected with *rab11a* KI cocktails using different donor-types and/or gRNAs targeting different genomic sites. Larvae showing mosaic eGFP-Rab11a expression were raised and outcrossed to WT fish, and the genomic integration site was analyzed by sequencing of 3 independently generated alleles. INDELs and SNPs present in the donor-derived sequence or at the integration boundaries are highlighted in orange. The intron 1 portion of the donor-derived sequence for panel C was 389 bp shorter than those of panels A–B (491 bp versus 102 bp). No differences in eGFP-Rab11a expression were observed between the 3 alleles. *TgKI(eGFP-rab11a)<sup>pd1244</sup>*, which was used for all imaging experiments in this study, derives from the allele in panel C. Annotated sequence files for the 3 alleles are provided in Supplementary Files 5, 7, and 8. Noncoding variants present up- and downstream of the integration sites are not depicted and result from WT fish of the EK or AB/TL background being used to generate the different alleles.

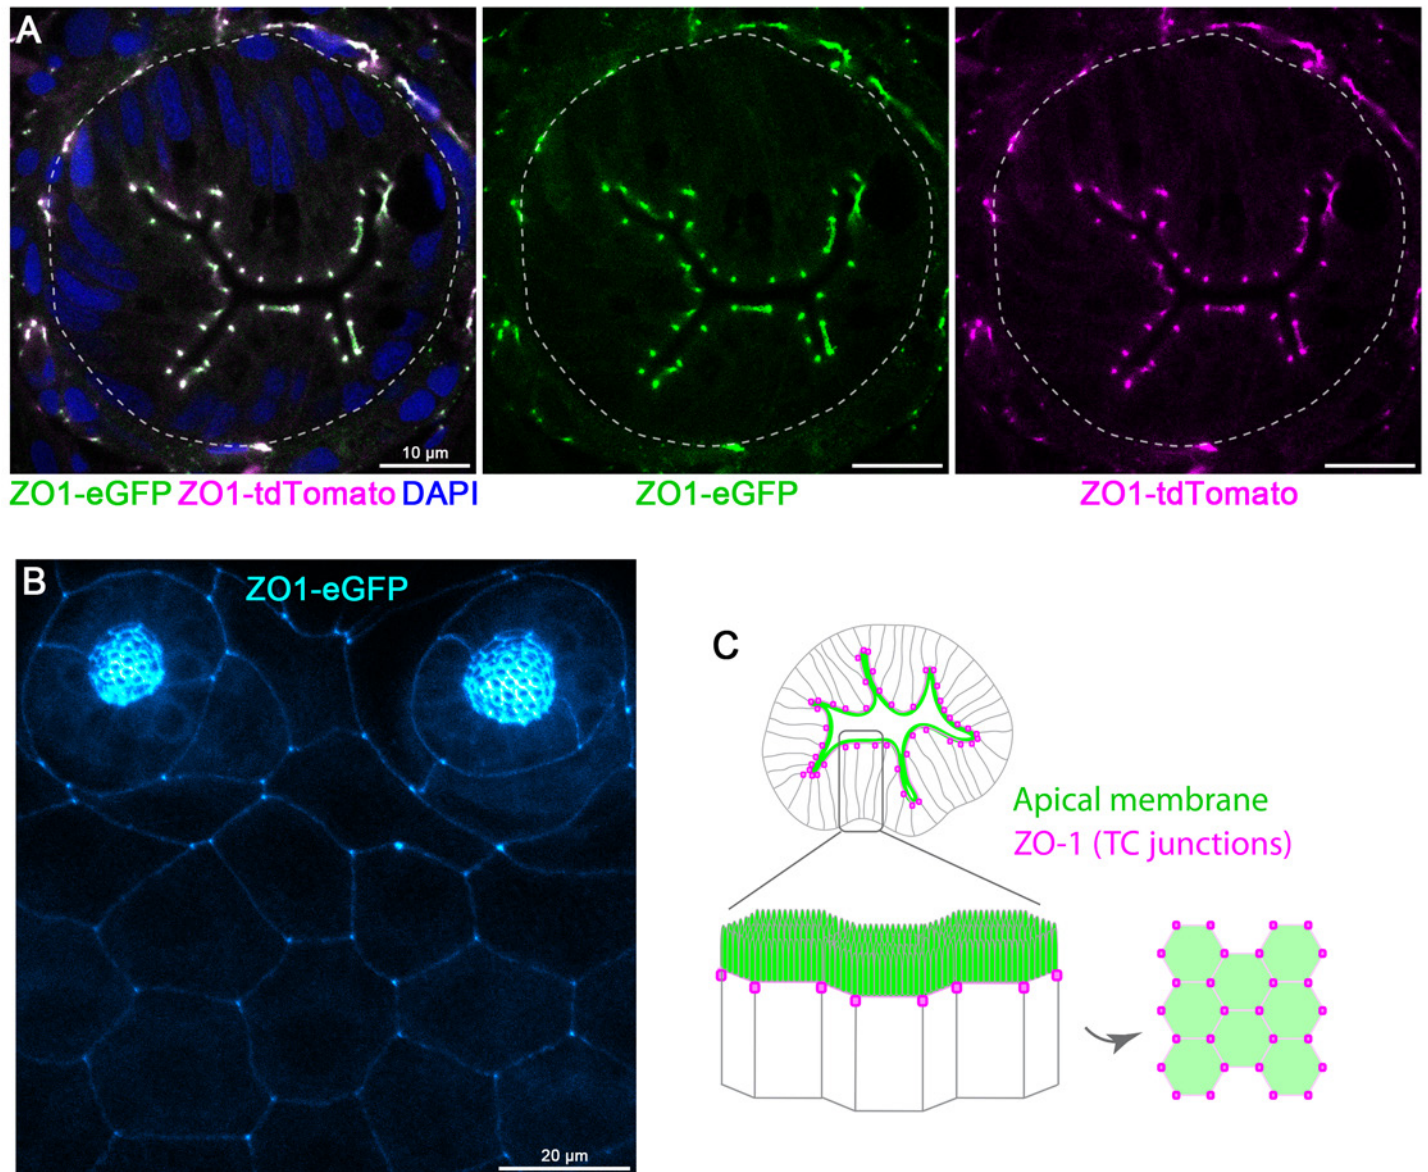

**Fig. S3. Colocalization of compound heterozygous tagged ZO1 (*tjp1a*) alleles and localization to tricellular junctions.** (A) Transverse sections of a *TgKl(tjp1a-eGFP)<sup>pd1252</sup>;TgKl(tjp1a-tdTomato)<sup>pd1224</sup>* compound heterozygous larva at 5 dpf. Scale bars are 10 μm. (B) Live imaging of the epidermis of a 5 dpf *TgKl(tjp1a-eGFP)<sup>pd1252</sup>* larva. Scale bars is 20 μm. (C) Schematic illustrating the enriched localization of endogenously tagged ZO1 to tricellular (TC) junctions.



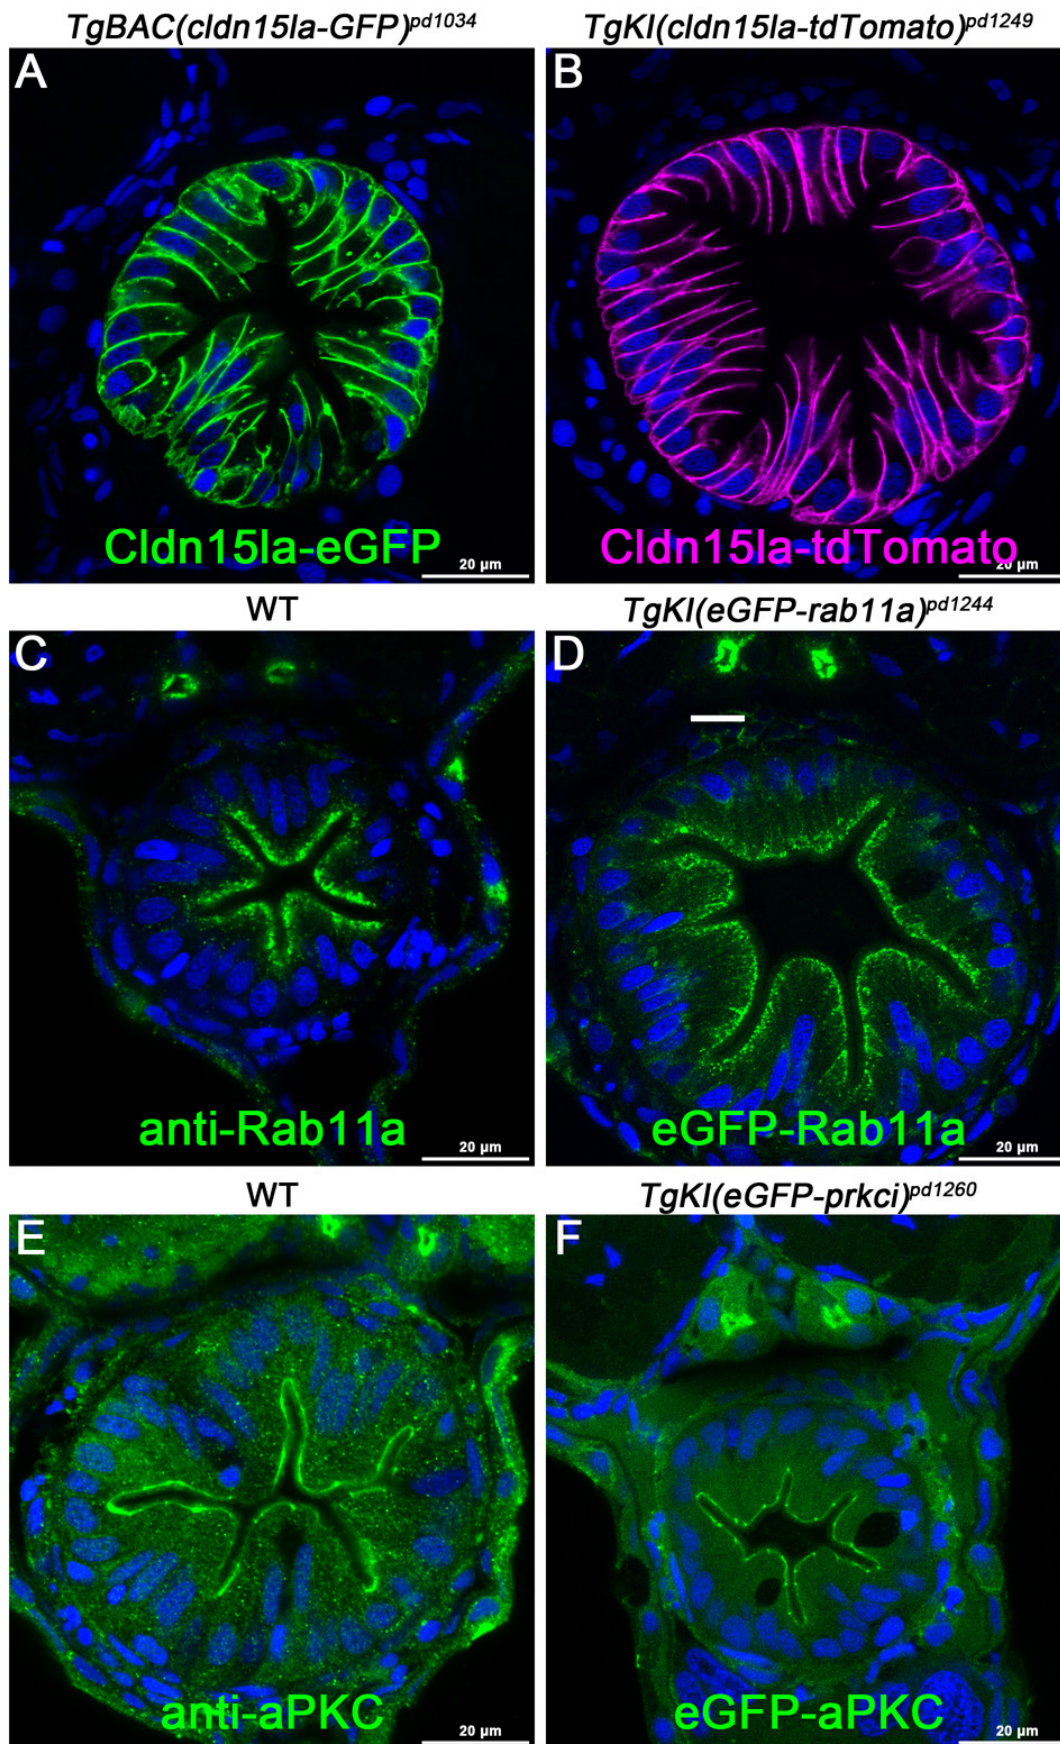



**Fig. S4. Comparison of endogenously tagged proteins with transgene or antibody labeling. (A-B)**

Transverse section of the midgut of BAC transgenic line *TgBAC(cldn15la-GFP)<sup>pd1034</sup>* (Alvers et al., 2014) and KI line *TgKI(cldn15la-tdTomato)<sup>pd1249</sup>*. Both proteins are localized to the basolateral membrane, while the BAC transgenic line also shows sparse cytoplasmic labeling. **(C-D)** WT larvae stained with anti-Rab11a antibody (Cell Signaling 5589S) (Levic et al., 2020) resemble the KI line *TgKI(eGFP-rab11a)<sup>pd1244</sup>*, with prominent labeling in the apical cytoplasm of IECs and the PN. **(E-F)** WT larvae stained with anti-aPKC antibody (Santa Cruz sc-216) (Bagnat et al., 2007) resemble the KI line *TgKI(eGFP-prkci)<sup>pd1260</sup>*, with enriched labeling of the apical cortex of IECs and PN. DAPI is shown in blue for all panels.

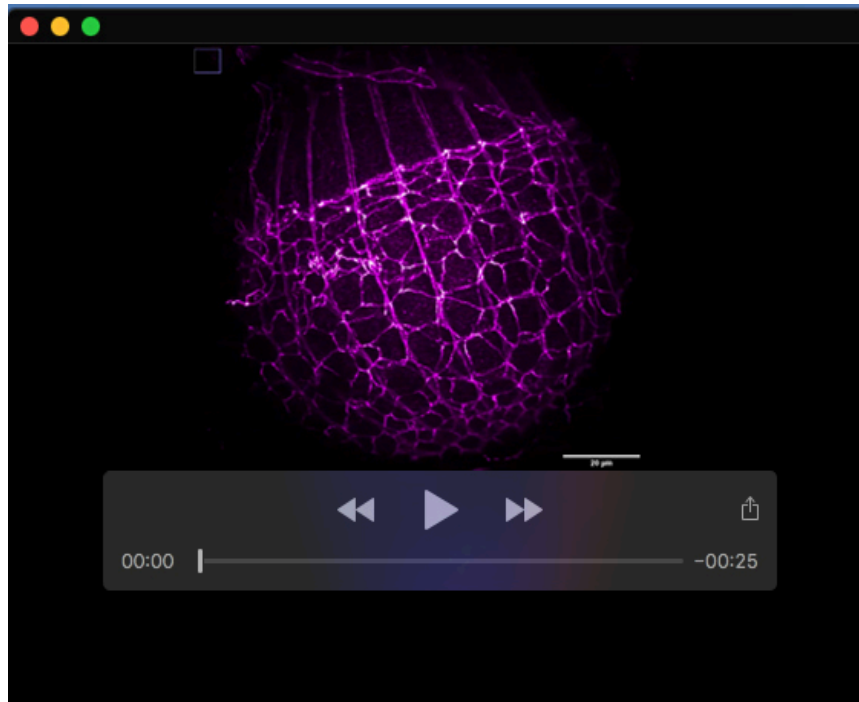

**Movie 1.** Rotating 3D reconstruction of ZO1-tdTomato expression in the lens. Data are from Fig. 2B.

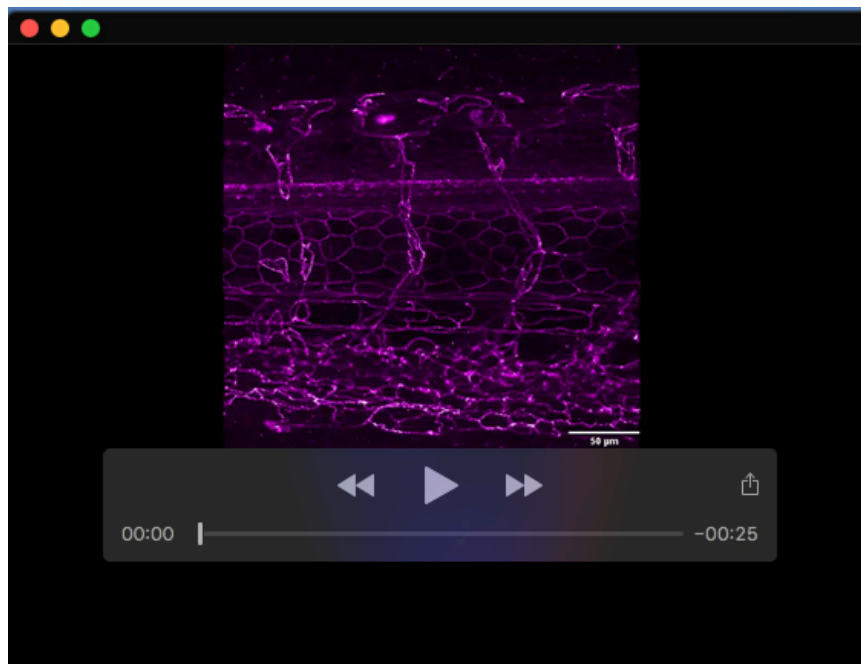

**Movie 2.** Rotating 3D reconstruction of ZO1-tdTomato expression in the embryonic trunk. Data are from Fig. 2C.

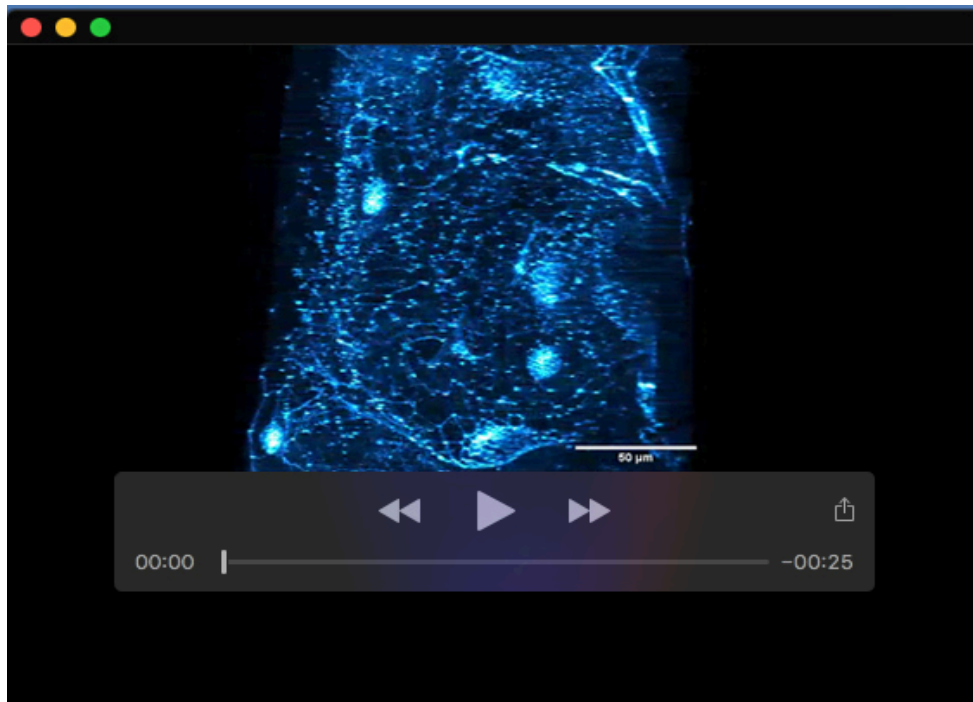

**Movie 3. Rotating 3D reconstruction of ZO1-tdTomato expression in the otic capsule.** Data are from Fig. 2D.

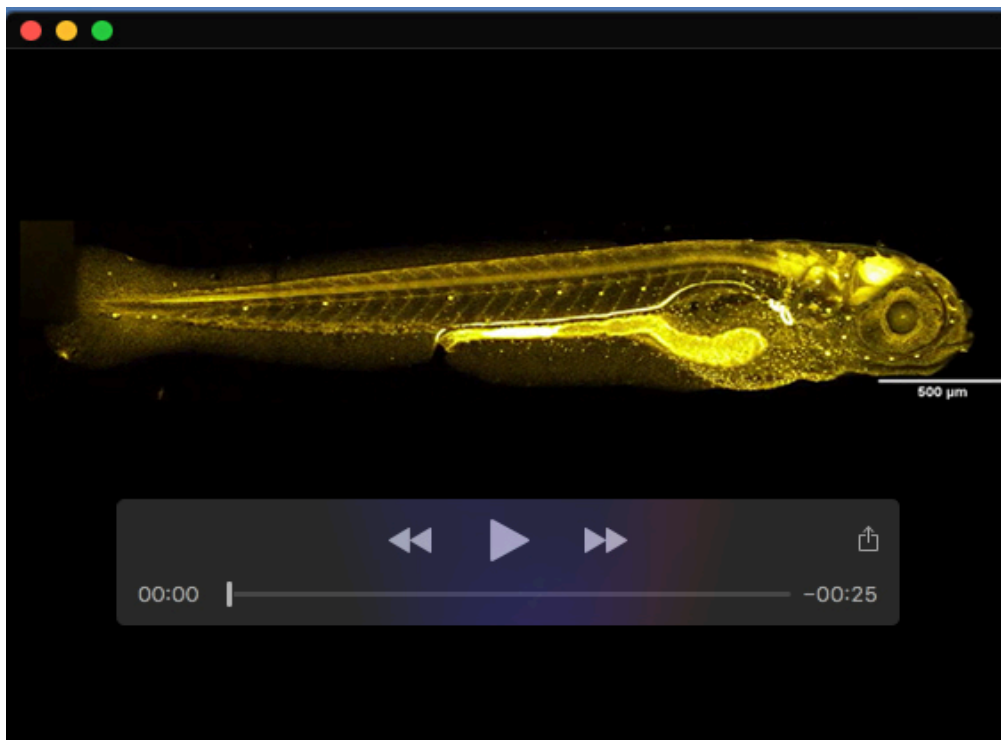

**Movie 4. Rotating 3D reconstruction eGFP-Rab11a expression in 5 dpf whole larvae.** Data are from Fig. 3A.

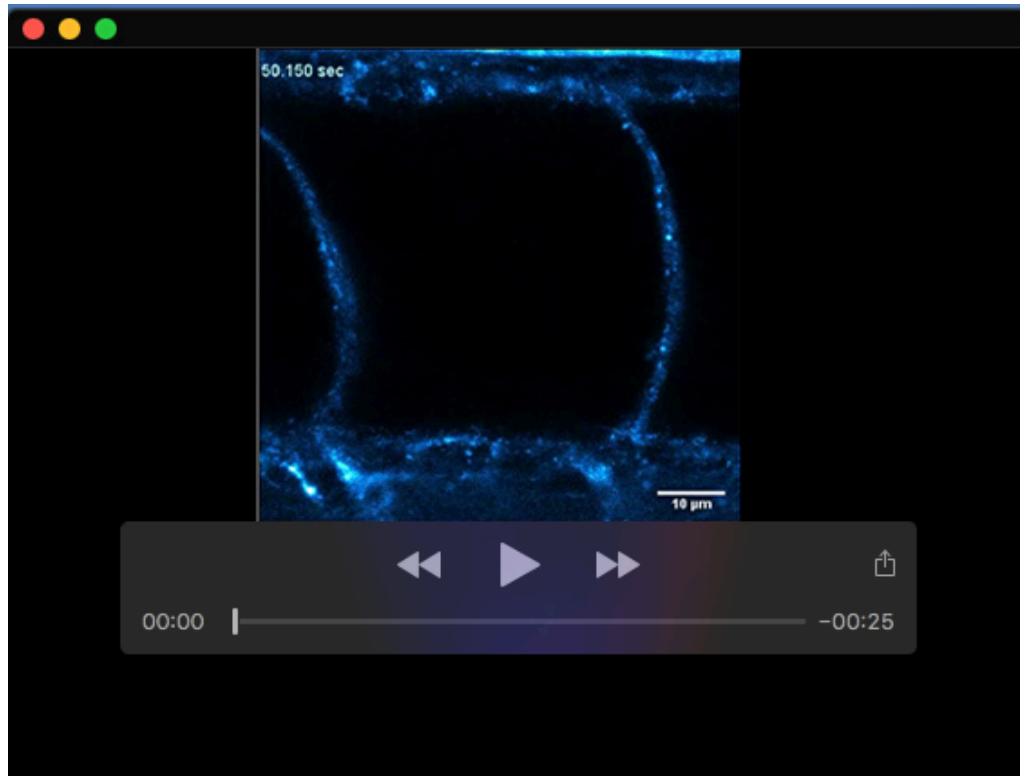

**Movie 5. Live imaging of eGFP-Rab11a vesicle dynamics in notochord vacuole cells.** Data are related to Fig. 3C. Data were acquired at 1 frame every 3 seconds.



**File S1.** Sequence file for the genomic integration site of *TgKI(tjp1a-tdTomato)<sup>pd1224</sup>*.

[Click here to download Dataset 1](#)

**File S2.** Sequence file for the genomic integration site of *TgKI(tjp1a-eGFP)<sup>pd1252</sup>*.

[Click here to download Dataset 2](#)

**File S3.** Sequence file for the genomic integration site of *TgKI(cldn15la-tdTomato)<sup>pd1249</sup>*.

[Click here to download Dataset 3](#)

**File S4.** Sequence file for the genomic integration site of *TgKI(itgb1b-tdTomato)<sup>sk108</sup>*.

[Click here to download Dataset 4](#)

**File S5.** Sequence file for the genomic integration site of *TgKI(eGFP-rab11a)<sup>pd1244</sup>*.

[Click here to download Dataset 5](#)

**File S6.** Sequence file for the genomic integration site of *TgKI(eGFP-prkci)<sup>pd1260</sup>*.

[Click here to download Dataset 6](#)

**File S7.** Sequence file for the genomic integration site of the *eGFP-rab11a* allele presented in Fig. S2A.

[Click here to download Dataset 7](#)

**File S8.** Sequence file for the genomic integration site of the *eGFP-rab11a* allele presented in Fig. S2B.

[Click here to download Dataset 8](#)

**File S9.** Detailed protocol for endogenous tagging in zebrafish.

[Click here to download Dataset 9](#)
